# Supplementary material for: A rare subpopulation of melanoma cells with low expression of metastasis suppressor NME1 is highly metastatic in vivo
Source: PubMed Central journal article supplement (PMC7005181; doi:10.1038/s41598-020-58996-3), 2020-02-06
Supplement: 41598_2020_58996_MOESM1_ESM.pdf [file 41598_2020_58996_MOESM1_ESM.pdf]

## **Supplementary Information**

**A rare subpopulation of melanoma cells with low expression of metastasis  
suppressor NME1 is highly metastatic *in vivo***

**Devin Snyder, Ying Wang and David M. Kaetzel**

**a.**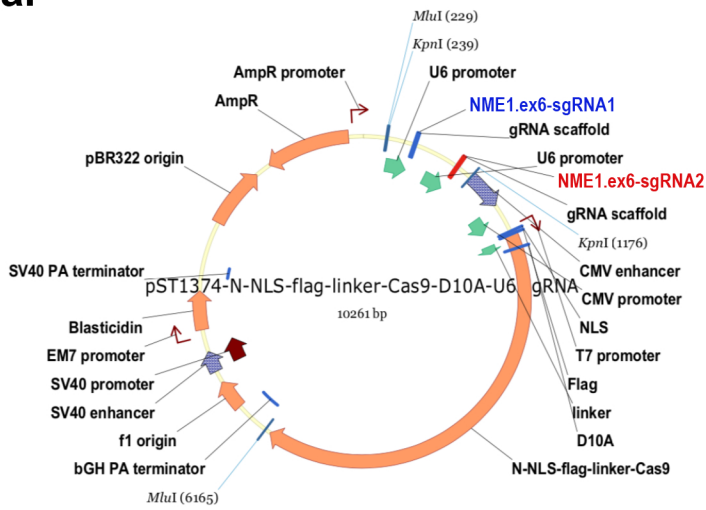**b.**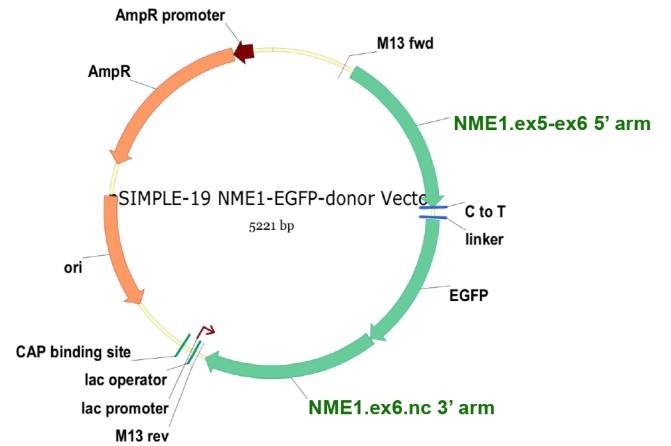

**Supplementary Figure 1. (a)** Map of pST1374-N-NLS-flag-linker-Cas9-D10A-U6 gRNA used for expression of sgRNAs 1 and 2 (highlighted in blue and red font, respectively), gRNA scaffold, and Cas9. **(b)** Map of pSIMPLE-19 NME1-EGFP donor vector. Highlighted within the map are the 5' arm derived from the junction of exons 5 and 6 of the NME1 gene and the 3' arm derived from non-coding (nc) sequence from exon 6.

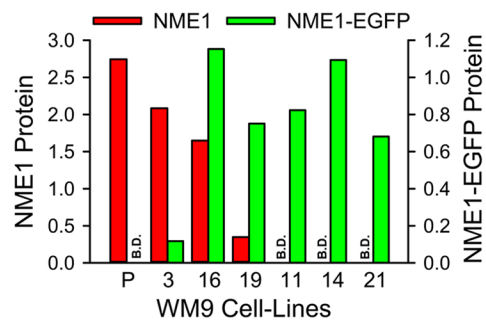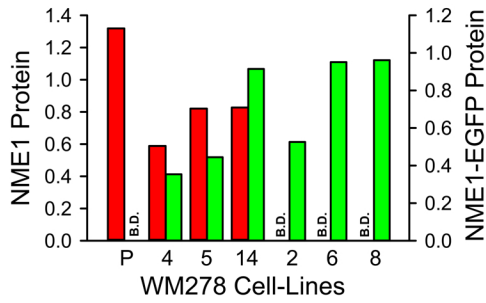

**Supplementary Figure 2.** Quantification of immunoblot images in Fig. 1e. B.D., below detection. Intensities of bands corresponding to native NME1 (19 kDa) and the NME-EGFP fusion protein (47 kDa) were quantified using ImageJ.

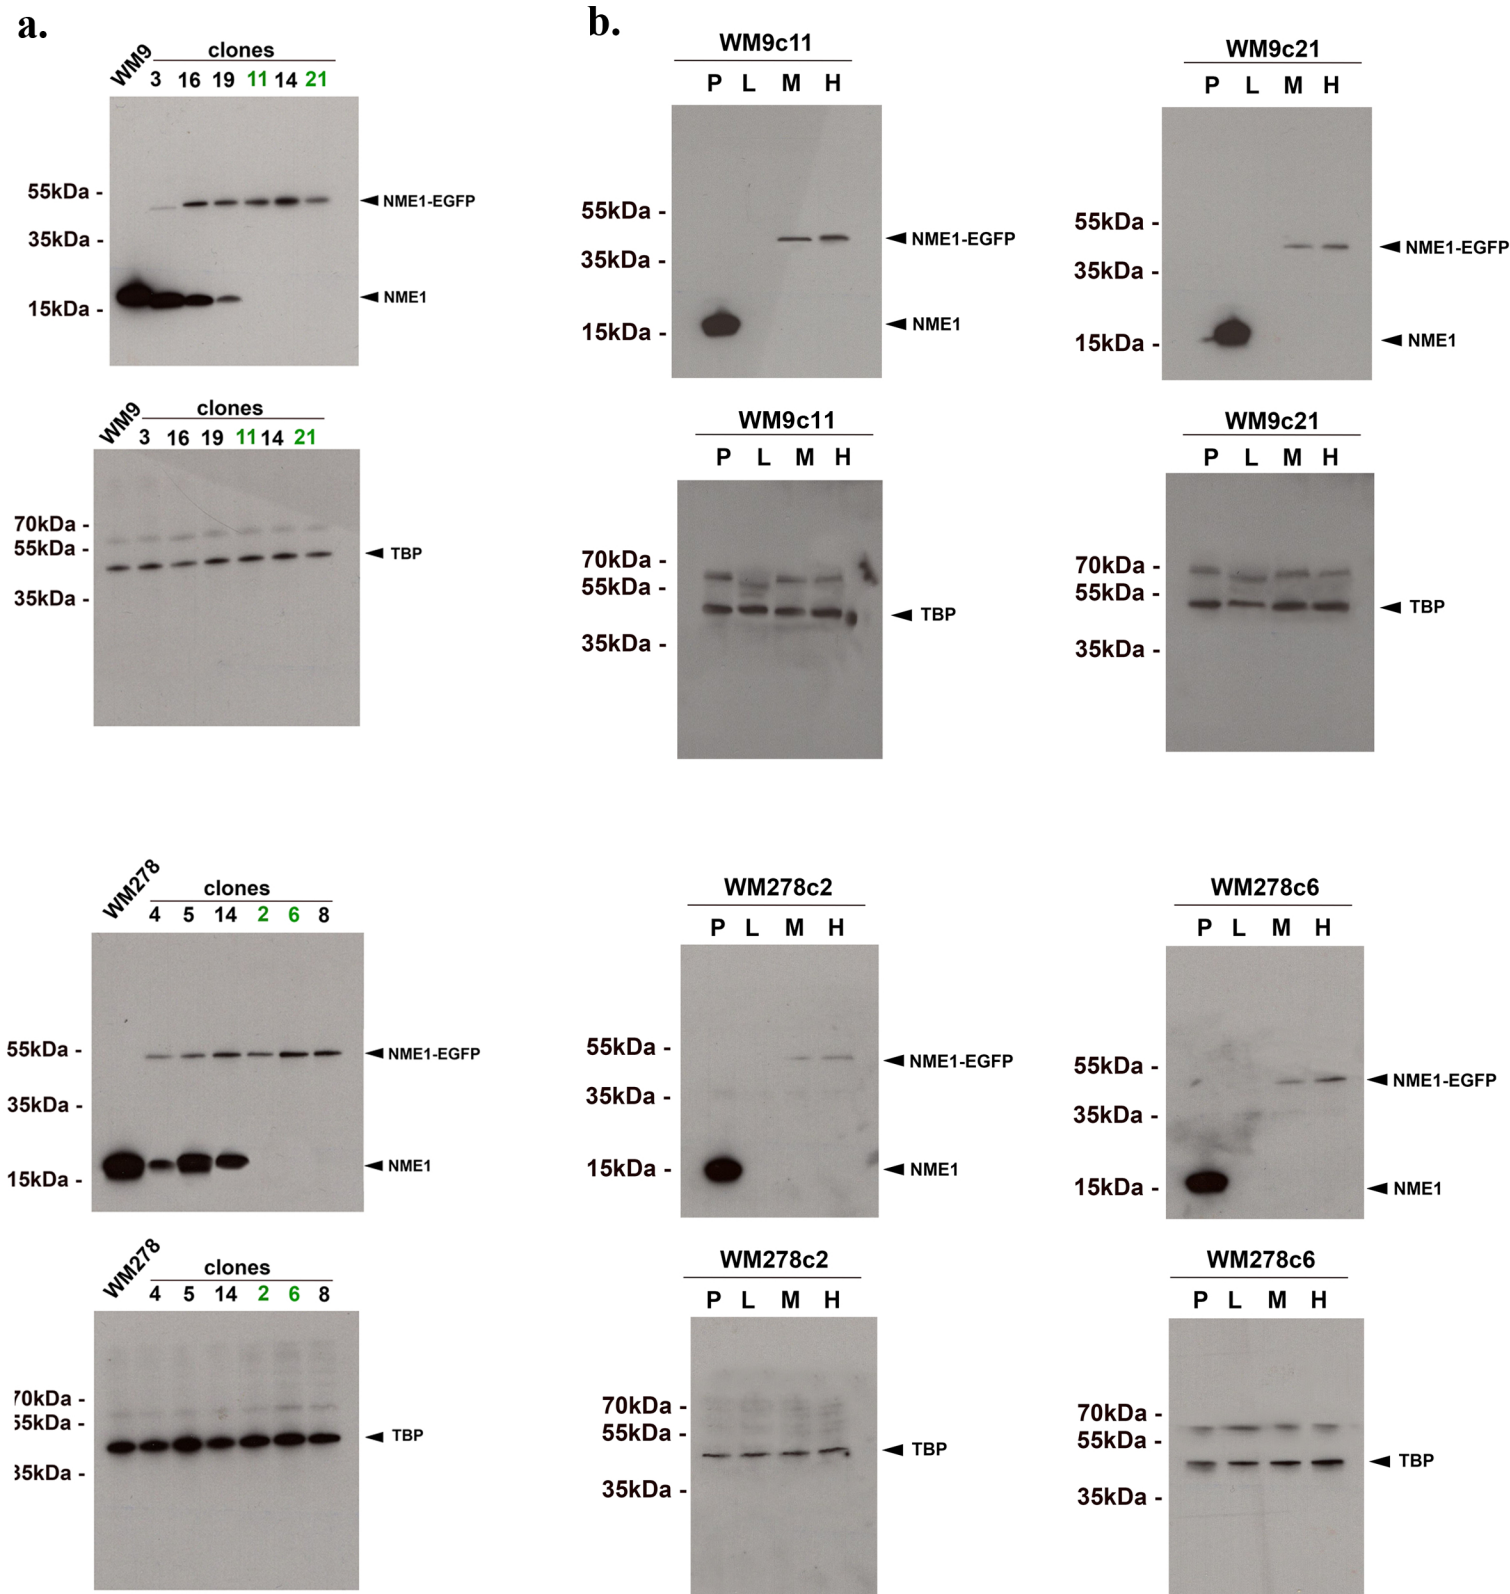

**Figure S3.** (a) Images of full-size immunoblots corresponding to data shown in Figure 1e. (b) Images of full-size immunoblots corresponding to data shown in Figure 1h.



## WM9

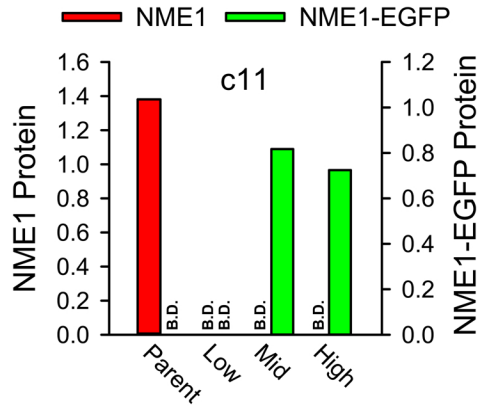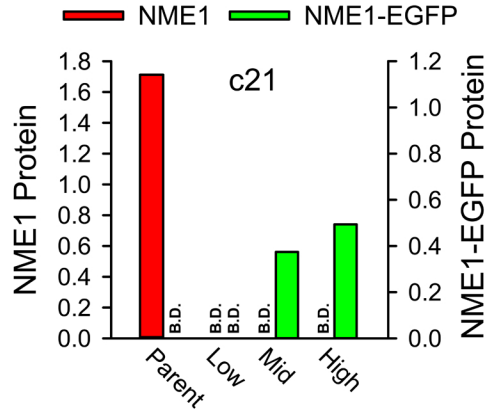

## WM278

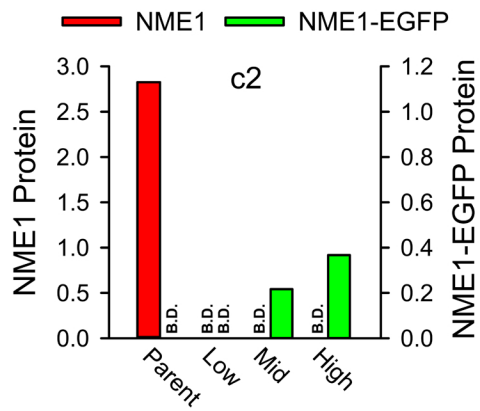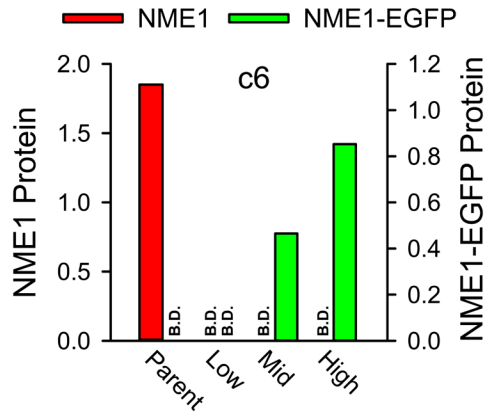

**Supplementary Figure 4.** Quantification of immunoblot images in Fig. 1h. B.D., below detection. Bands corresponding to native NME1 and the NME1-EGFP fusion protein were quantified using ImageJ.

**WM9c21**

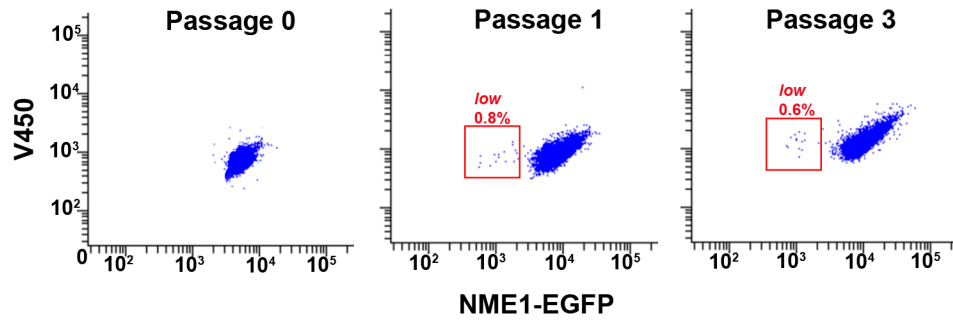

**WM278c2**

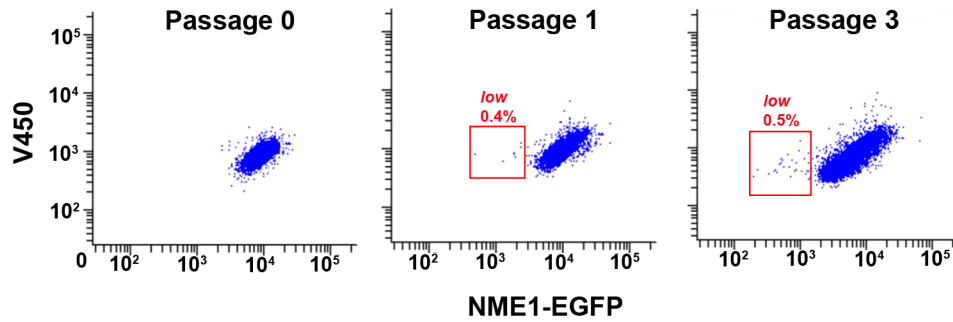

**Supplementary Figure 5.** NME1<sup>HIGH</sup> subpopulations from WM9c21 and WM278c2 re-establish low-abundance NME1<sup>LOW</sup> subpopulations after passaging in monolayer culture. Red boxes identify NME1<sup>LOW</sup> cells in the respective cultures.

## WM9c21

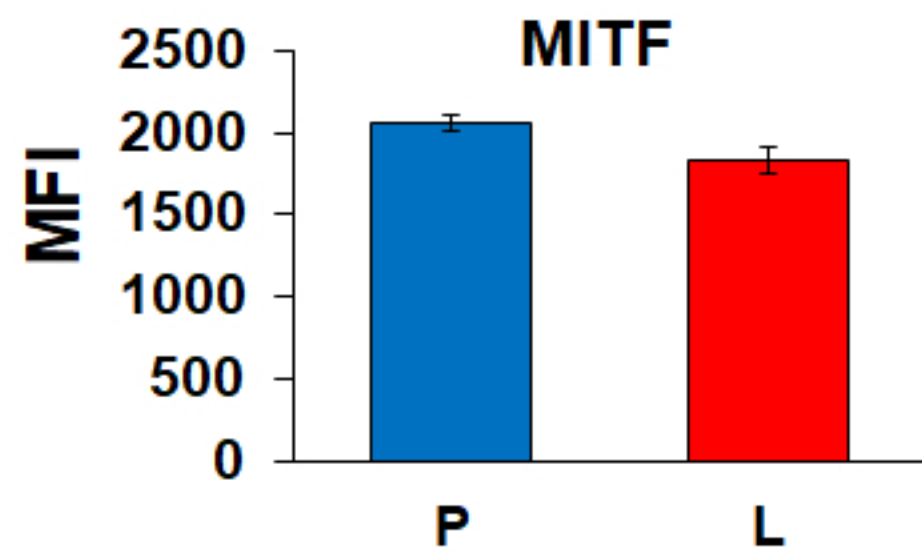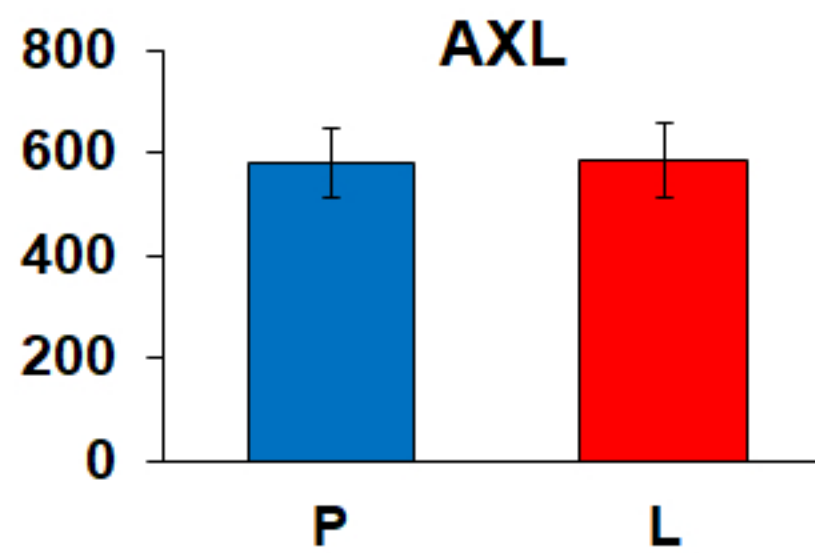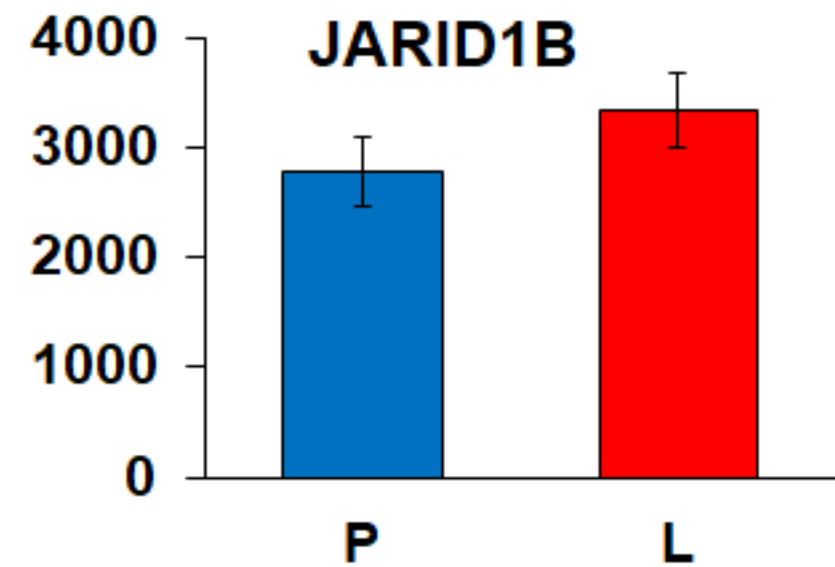

## WM278c2

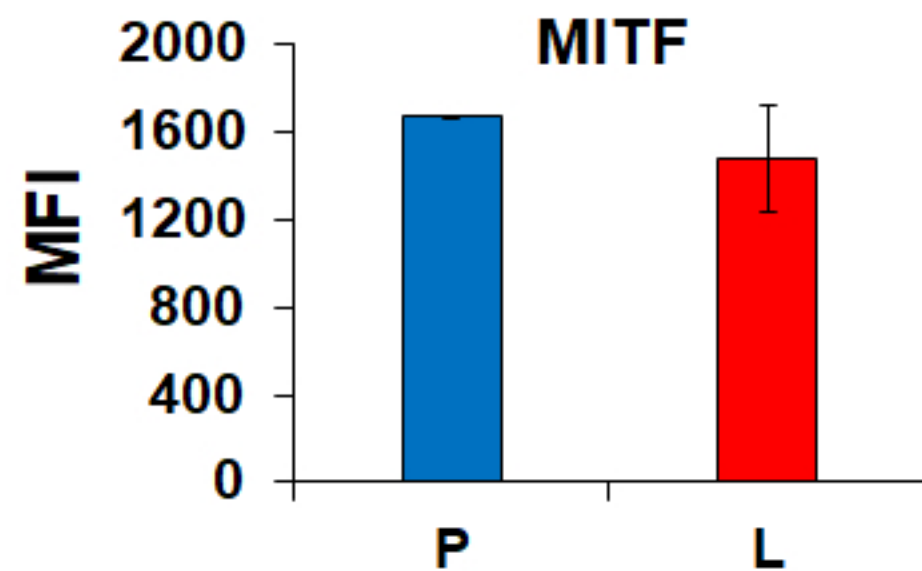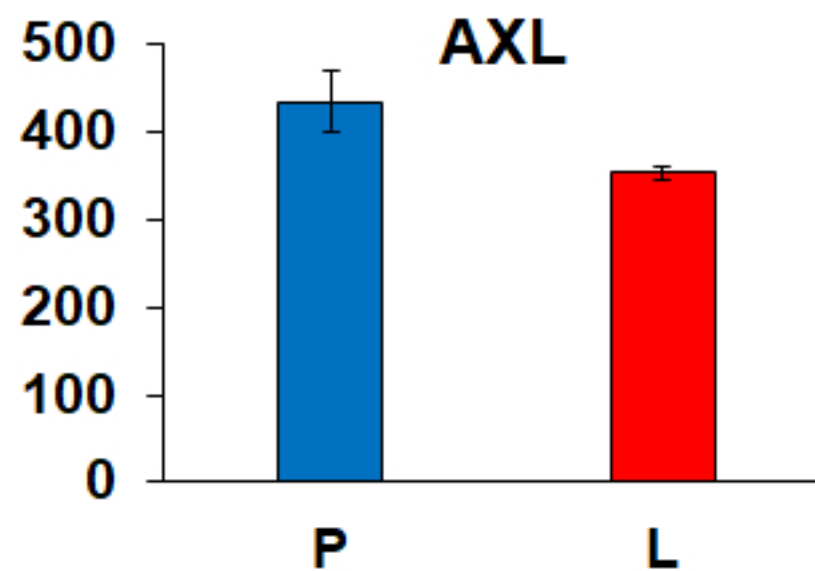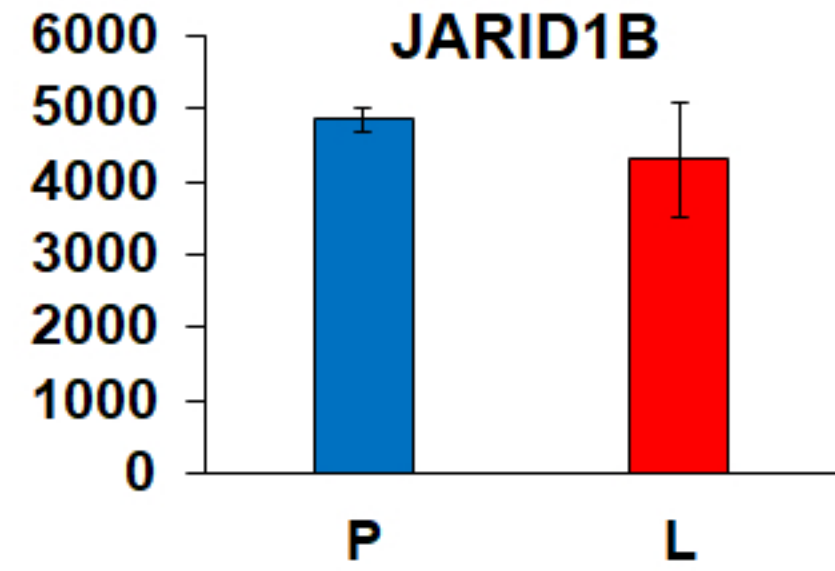

**Supplementary Figure 6.** Expression of MITF, AXL and JARID1B is unaltered in NME1<sup>LOW</sup> subpopulations from WM9c21 and WM278c2 cells. *P*, parental/unsorted cells; *L*, NME1<sup>LOW</sup> cells. Mean fluorescence intensity (MFI) represents the average expression of the interrogated proteins on a per cell basis, determined as described in Methods.

## WM9c21

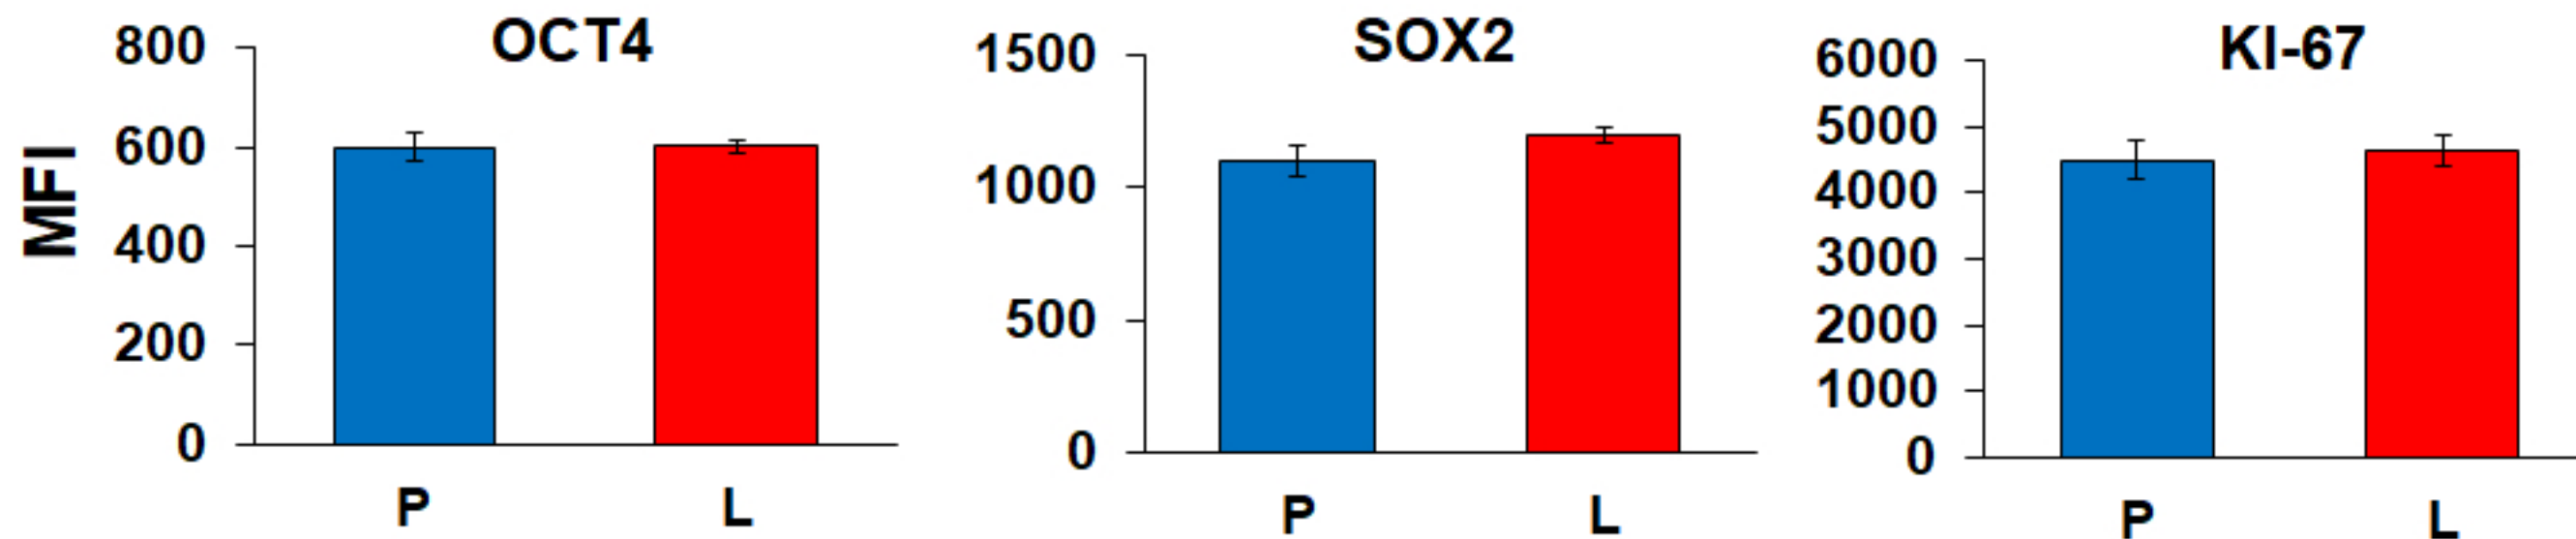

## WM278c2

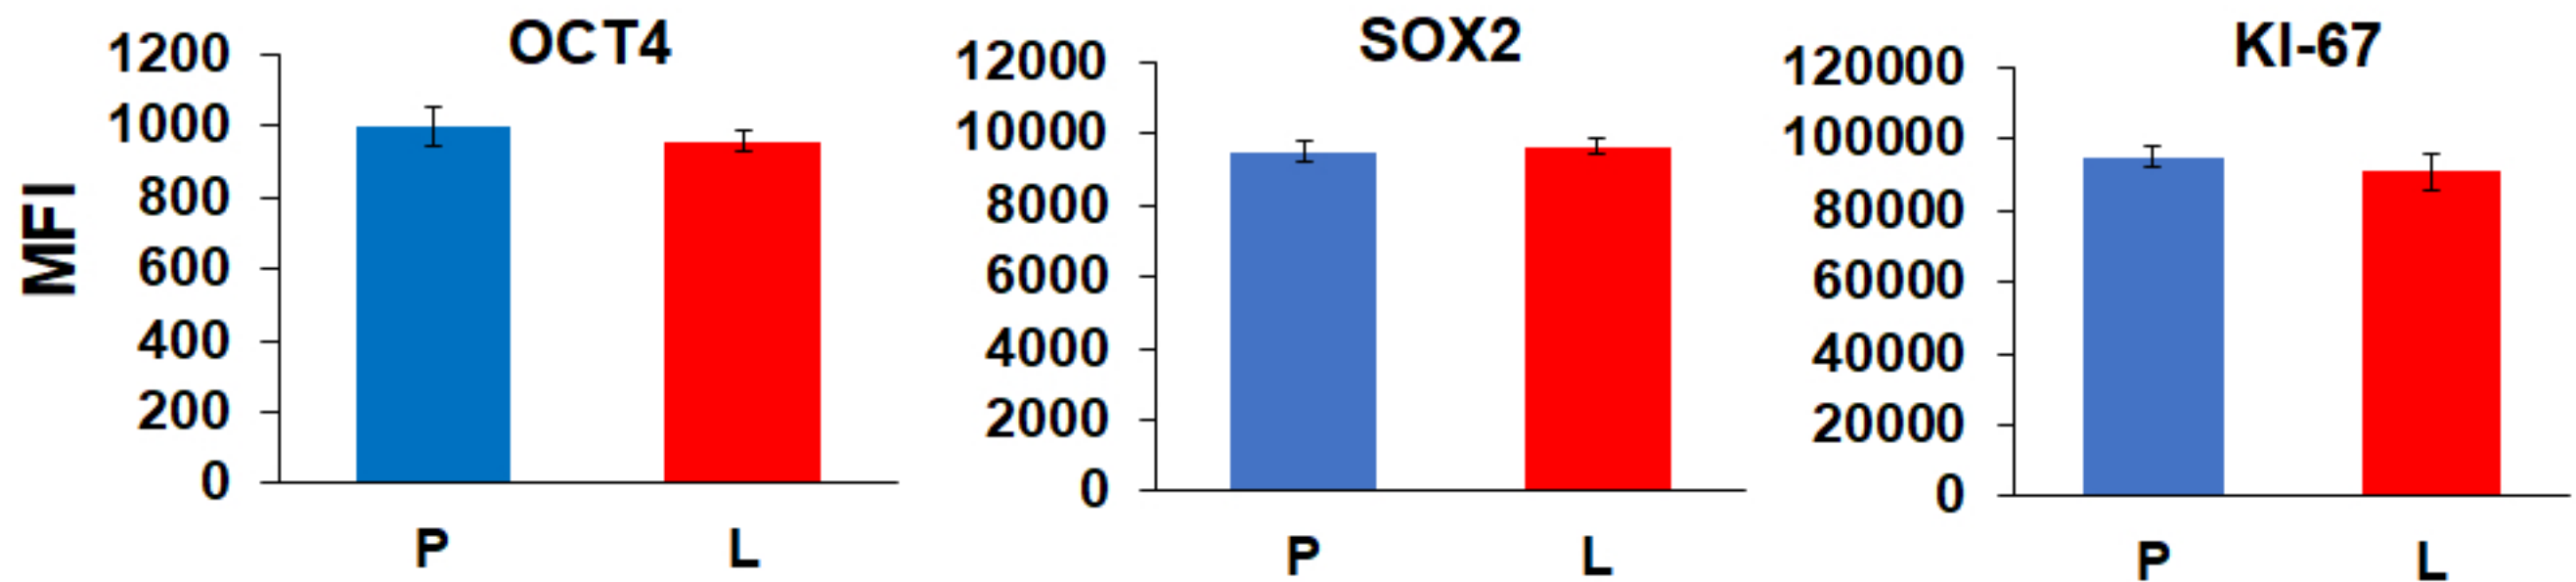

**Supplementary Figure 7.** Expression of stem cell markers OCT4, SOX2 and KI67 is unaltered in NME1<sup>LOW</sup> subpopulations from WM9c21 and WM278c2 cells. P, unsorted parental cells; L, NME1<sup>LOW</sup> cells.

**Table S1A.** sgRNA sequences used for CRISPR-Cas9-mediated insertion of EGFP coding sequence into the genomic *NME1* locus.

| sgRNA           | Sequence (5' - 3')              |
|-----------------|---------------------------------|
| NME1.ex6-sgRNA1 | <b>CCT</b> GAGGAACTGGTAGATTACAC |
| NME1.ed6-sgRNA2 | GAACTGGATCTATGAATGAC <b>AGG</b> |

Note: Nucleotides in blue represent the PAM sequence

**Table S1B.** Oligodeoxynucleotide primers used for sequencing of *NME1-EGFP* coding sequence in CRISPR-Cas9-engineered melanoma cell lines.

| Primer   | Sequence (5' - 3')     |
|----------|------------------------|
| NME1-1F  | CGGCCAGTGAATTAGAACTCGG |
| NME1-1R  | CTTCACCACATTCAGCCCCTCC |
| NME1-2F  | CTTCTGTCCTTGGAGGTCTGGG |
| NME1-2R  | GCCAAACGCCAACTTAAGAGGG |
| NME1-3F  | CCCTCTTAAGTTGGCGTTTGGC |
| NME1-3R  | GGATTAAAATGCGCCCATTGCC |
| NME1-4F  | GCTGTGGCTGTAGATTTCTGGC |
| NME1-4R  | GGACACGCTGAACTTGTGGC   |
| NME1-5F  | GTAAACGGCCACAAGTTCAGCG |
| NME1-5R  | GCCCTCGAACTTCACCTCGG   |
| NME1-6F  | GACGACGGCAACTACAAGACCC |
| NME1-6R  | GTCTTTGCTCAGCTTGGACTGG |
| NME1-7F  | GACAACCACTACCTGAGCACCC |
| NME1-7R  | TTAATCAGATGGTCGGGGATGG |
| NME1-8F  | TCTTGGAGCTGTGAGTTCTCCC |
| NME1-8R  | TCTGCACCTAGTCCAGTCTTGG |
| NME1-9F  | GGCACTGAGCTATTCAACAGGC |
| NME1-9R  | ACCCTGGACTTGAAGTTCTGGC |
| NME1-10F | AGAAGTTCAAGTCCAGGGTGGG |
| NME1-10R | TGATTACGCCAAGTTTGCACGC |

**Table S2A.** List of genes differentially expressed in the NME1<sup>LOW</sup> subpopulation.

| Gene        | Log Fold Change | P-Value  | False Discovery Rate |
|-------------|-----------------|----------|----------------------|
| MTATP6P1    | 1.01            | 2.88E-20 | 6.72E-17             |
| SLIT2       | 1.01            | 1.17E-03 | 4.51E-02             |
| GPRC5A      | 1.02            | 1.68E-05 | 1.74E-03             |
| FAM3C2      | 1.03            | 7.98E-10 | 3.07E-07             |
| OLFML2B     | 1.04            | 5.22E-06 | 6.59E-04             |
| RPL9P7      | 1.04            | 4.80E-09 | 1.54E-06             |
| EDIL3       | 1.05            | 2.18E-08 | 6.21E-06             |
| PLXNA2      | 1.07            | 5.49E-06 | 6.89E-04             |
| MRGPRX4     | 1.07            | 1.04E-05 | 1.17E-03             |
| FBL         | 1.07            | 2.28E-04 | 1.36E-02             |
| NT5E        | 1.08            | 2.10E-21 | 6.12E-18             |
| HEY1        | 1.09            | 8.89E-17 | 1.20E-13             |
| AC124947.1  | 1.09            | 1.28E-03 | 4.80E-02             |
| SLC44A5     | 1.09            | 1.29E-05 | 1.40E-03             |
| LINC00973   | 1.09            | 3.43E-04 | 1.89E-02             |
| COL12A1     | 1.11            | 6.37E-07 | 1.17E-04             |
| AZIN1-AS1   | 1.12            | 8.84E-04 | 3.72E-02             |
| AC004057.1  | 1.12            | 2.17E-15 | 2.37E-12             |
| ITIH6       | 1.12            | 2.77E-15 | 2.94E-12             |
| TGFA        | 1.12            | 7.72E-20 | 1.69E-16             |
| VPS28       | 1.13            | 3.96E-04 | 2.11E-02             |
| ZEB1-AS1    | 1.13            | 4.03E-04 | 2.13E-02             |
| SLCO4A1-AS1 | 1.14            | 1.09E-05 | 1.21E-03             |
| CXCL8       | 1.15            | 2.40E-06 | 3.69E-04             |
| ITPK1       | 1.15            | 1.22E-06 | 2.06E-04             |
| AC090673.1  | 1.16            | 1.25E-03 | 4.75E-02             |
| ZYX         | 1.16            | 3.72E-04 | 2.01E-02             |
| LINC01389   | 1.17            | 3.55E-04 | 1.93E-02             |
| BMP2        | 1.17            | 6.65E-04 | 3.07E-02             |
| FP325330.3  | 1.18            | 8.87E-04 | 3.73E-02             |
| AC091173.1  | 1.18            | 9.65E-05 | 7.07E-03             |
| RAD17       | 1.18            | 1.08E-05 | 1.21E-03             |
| TJP1        | 1.19            | 6.13E-04 | 2.92E-02             |
| PAPPA       | 1.19            | 2.93E-04 | 1.66E-02             |
| AHNAK2      | 1.21            | 8.06E-08 | 1.93E-05             |
| TUBA4A      | 1.21            | 1.08E-04 | 7.76E-03             |
| AK4P3       | 1.21            | 5.57E-04 | 2.69E-02             |
| CEP170      | 1.21            | 9.54E-09 | 2.91E-06             |
| VIT         | 1.22            | 1.05E-11 | 5.83E-09             |
| MYEOV       | 1.22            | 1.77E-04 | 1.14E-02             |
| LGI3        | 1.27            | 4.50E-04 | 2.29E-02             |
| RPL41P1     | 1.27            | 1.16E-07 | 2.70E-05             |

**Table S2A.** List of genes differentially expressed in the NME1<sup>LOW</sup> subpopulation (continued).

| Gene       | Log Fold Change | P-Value  | False Discovery Rate |
|------------|-----------------|----------|----------------------|
| RYR2       | 1.28            | 2.81E-04 | 1.61E-02             |
| SMIM10L2A  | 1.28            | 2.04E-04 | 1.25E-02             |
| HIST1H4H   | 1.29            | 3.13E-05 | 2.89E-03             |
| ABCA10     | 1.29            | 7.14E-04 | 3.20E-02             |
| CHORDC1    | 1.29            | 2.73E-08 | 7.52E-06             |
| PCDHGA4    | 1.30            | 3.56E-09 | 1.21E-06             |
| AC012085.1 | 1.33            | 1.13E-08 | 3.34E-06             |
| AC215219.1 | 1.35            | 1.79E-04 | 1.15E-02             |
| LINC01762  | 1.35            | 8.23E-04 | 3.52E-02             |
| SLCO4A1    | 1.35            | 3.24E-13 | 2.46E-10             |
| AL121772.1 | 1.37            | 2.60E-06 | 3.91E-04             |
| CD70       | 1.37            | 3.09E-04 | 1.74E-02             |
| NTRK2      | 1.37            | 1.05E-06 | 1.81E-04             |
| PDE2A      | 1.42            | 9.75E-04 | 4.01E-02             |
| NPTX1      | 1.42            | 2.13E-04 | 1.30E-02             |
| FAM20C     | 1.42            | 8.98E-19 | 1.65E-15             |
| PHRF1      | 1.42            | 6.22E-04 | 2.96E-02             |
| MIR100HG   | 1.42            | 2.77E-08 | 7.59E-06             |
| KIAA1456   | 1.43            | 1.50E-04 | 9.99E-03             |
| FAM230C    | 1.44            | 3.81E-05 | 3.36E-03             |
| CLCA2      | 1.44            | 4.11E-04 | 2.15E-02             |
| LYPD1      | 1.44            | 7.38E-05 | 5.77E-03             |
| FYB        | 1.47            | 1.59E-05 | 1.67E-03             |
| NAPEPLD    | 1.48            | 9.57E-06 | 1.09E-03             |
| CLDN4      | 1.48            | 9.11E-06 | 1.04E-03             |
| RAMP1      | 1.49            | 1.16E-18 | 2.03E-15             |
| PLPP4      | 1.49            | 4.52E-08 | 1.15E-05             |
| AC002384.2 | 1.51            | 5.84E-07 | 1.09E-04             |
| RPL21P93   | 1.52            | 1.38E-09 | 5.20E-07             |
| GFRA1      | 1.53            | 1.70E-08 | 4.91E-06             |
| MGLL       | 1.53            | 1.72E-17 | 2.51E-14             |
| PPP1R14C   | 1.61            | 1.84E-12 | 1.19E-09             |
| SCARA5     | 1.62            | 2.80E-14 | 2.33E-11             |
| YTHDC1     | 1.62            | 5.72E-05 | 4.72E-03             |
| AREG       | 1.63            | 1.35E-04 | 9.28E-03             |
| CDH13      | 1.63            | 4.11E-13 | 2.94E-10             |
| MPP4       | 1.65            | 1.40E-13 | 1.12E-10             |
| SLC14A1    | 1.66            | 6.44E-06 | 7.83E-04             |
| IGFBP5     | 1.67            | 2.08E-10 | 9.01E-08             |
| AKR1C1     | 1.71            | 7.23E-09 | 2.24E-06             |
| BHLHE41    | 1.74            | 1.69E-06 | 2.69E-04             |
| RASAL1     | 1.85            | 1.22E-06 | 2.06E-04             |



**Table S2A.** List of genes differentially expressed in the NME1<sup>LOW</sup> subpopulation (continued).

| Gene       | Log Fold Change | P-Value   | False Discovery Rate |
|------------|-----------------|-----------|----------------------|
| TMEM50B    | 1.88            | 7.95E-05  | 6.06E-03             |
| CACNA2D4   | 1.88            | 4.70E-09  | 1.52E-06             |
| CCDC81     | 1.88            | 2.04E-04  | 1.25E-02             |
| AL158064.1 | 1.94            | 7.09E-04  | 3.18E-02             |
| DCAF11     | 1.96            | 1.86E-09  | 6.70E-07             |
| CCDC162P   | 1.96            | 7.47E-04  | 3.29E-02             |
| AL133284.1 | 1.98            | 5.03E-04  | 2.49E-02             |
| EPHA4      | 1.99            | 8.84E-06  | 1.03E-03             |
| PTEN       | 2.06            | 5.28E-16  | 6.38E-13             |
| CU634019.1 | 2.07            | 1.09E-03  | 4.34E-02             |
| DUS4L      | 2.08            | 1.62E-05  | 1.69E-03             |
| AC156455.1 | 2.10            | 2.33E-05  | 2.31E-03             |
| THSD4      | 2.10            | 2.72E-09  | 9.42E-07             |
| PSG4       | 2.12            | 7.48E-05  | 5.81E-03             |
| CU638689.4 | 2.15            | 5.09E-05  | 4.30E-03             |
| AKT3       | 2.18            | 8.15E-13  | 5.60E-10             |
| PCSK1      | 2.18            | 6.31E-10  | 2.48E-07             |
| SCN4B      | 2.19            | 1.27E-03  | 4.78E-02             |
| APCDD1L    | 2.21            | 4.81E-04  | 2.42E-02             |
| HEPHL1     | 2.27            | 1.39E-04  | 9.46E-03             |
| AC092368.3 | 2.31            | 6.26E-04  | 2.96E-02             |
| KLF13      | 2.31            | 1.44E-05  | 1.53E-03             |
| AL161431.1 | 2.32            | 7.55E-04  | 3.32E-02             |
| LINC00462  | 2.36            | 8.82E-04  | 3.71E-02             |
| AC002056.1 | 2.50            | 1.30E-03  | 4.89E-02             |
| PINX1      | 2.57            | 5.20E-07  | 9.90E-05             |
| RPL4P5     | 2.58            | 1.00E-04  | 7.28E-03             |
| DHRS4      | 2.70            | 1.44E-08  | 4.23E-06             |
| SPATC1L    | 2.77            | 3.73E-07  | 7.25E-05             |
| NPIPA8     | 2.80            | 1.62E-04  | 1.05E-02             |
| NUDT4P1    | 2.88            | 2.66E-16  | 3.45E-13             |
| SLC14A2    | 3.15            | 4.86E-04  | 2.43E-02             |
| TRIML2     | 3.15            | 3.65E-08  | 9.48E-06             |
| PARN       | 3.42            | 5.91E-32  | 4.14E-28             |
| AP000561.1 | 3.44            | 3.58E-06  | 5.11E-04             |
| IGKV1OR-3  | 3.65            | 1.01E-03  | 4.11E-02             |
| SERTAD4    | 4.18            | 5.04E-12  | 2.94E-09             |
| ACTA2-AS1  | 4.49            | 8.92E-04  | 3.74E-02             |
| MIR3648-2  | 4.98            | 7.62E-05  | 5.91E-03             |
| PEG13      | 5.12            | 3.07E-05  | 2.85E-03             |
| SPINK1     | 5.29            | 7.71E-06  | 9.22E-04             |
| RPS18      | 5.66            | 2.57E-136 | 8.98E-132            |

**Table S2A.** List of genes differentially expressed in the NME1<sup>LOW</sup> subpopulation (continued).

| Gene       | Log Fold Change | P-Value  | False Discovery Rate |
|------------|-----------------|----------|----------------------|
| RHEBP1     | 6.86            | 2.16E-23 | 8.39E-20             |
| PPP3R1     | -1.01           | 2.17E-07 | 4.69E-05             |
| CDKN1B     | -1.01           | 1.21E-07 | 2.79E-05             |
| NAGS       | -1.01           | 1.10E-03 | 4.34E-02             |
| IPO7       | -1.03           | 4.14E-19 | 8.06E-16             |
| P2RX5      | -1.03           | 4.92E-06 | 6.36E-04             |
| APP        | -1.03           | 9.60E-25 | 4.80E-21             |
| FKBP10     | -1.03           | 4.61E-21 | 1.24E-17             |
| CBX1       | -1.04           | 1.83E-14 | 1.69E-11             |
| GET4       | -1.04           | 4.19E-05 | 3.65E-03             |
| AGAP2-AS1  | -1.05           | 6.55E-04 | 3.04E-02             |
| UBBP4      | -1.07           | 1.09E-06 | 1.87E-04             |
| LIMS2      | -1.09           | 1.02E-03 | 4.15E-02             |
| AL121594.1 | -1.11           | 8.67E-05 | 6.50E-03             |
| C15orf54   | -1.11           | 8.08E-05 | 6.15E-03             |
| EMC6       | -1.12           | 6.27E-04 | 2.96E-02             |
| GAPDHP40   | -1.14           | 5.98E-05 | 4.88E-03             |
| MAGEE1     | -1.15           | 6.42E-04 | 3.01E-02             |
| RAB11FIP4  | -1.15           | 1.33E-06 | 2.18E-04             |
| ITGA2B     | -1.18           | 8.13E-06 | 9.64E-04             |
| TGFBR3L    | -1.18           | 4.19E-04 | 2.17E-02             |
| HS6ST1P1   | -1.18           | 1.50E-04 | 9.99E-03             |
| NME2       | -1.18           | 4.84E-05 | 4.13E-03             |
| OXGR1      | -1.18           | 2.58E-04 | 1.50E-02             |
| TUBBP6     | -1.18           | 5.30E-04 | 2.58E-02             |
| SPRY3      | -1.18           | 3.39E-04 | 1.87E-02             |
| GSG2       | -1.19           | 4.31E-09 | 1.42E-06             |
| BX322650.1 | -1.19           | 5.77E-04 | 2.77E-02             |
| AC114947.2 | -1.20           | 4.75E-04 | 2.39E-02             |
| RPL30P4    | -1.21           | 3.85E-04 | 2.07E-02             |
| ADAMTS15   | -1.22           | 3.85E-13 | 2.81E-10             |
| C1QL4      | -1.22           | 1.23E-04 | 8.66E-03             |
| CCDC184    | -1.24           | 4.09E-04 | 2.14E-02             |
| IFI27L2    | -1.25           | 2.48E-05 | 2.43E-03             |
| HMGCS1     | -1.27           | 2.46E-34 | 2.15E-30             |
| ARHGEF25   | -1.27           | 1.03E-03 | 4.16E-02             |
| RANP6      | -1.28           | 1.93E-05 | 1.96E-03             |
| NPM3       | -1.28           | 4.84E-11 | 2.45E-08             |
| GNG10      | -1.28           | 7.75E-04 | 3.38E-02             |
| TNRC6C-AS1 | -1.29           | 3.83E-04 | 2.06E-02             |
| AC091133.5 | -1.33           | 5.97E-06 | 7.36E-04             |
| AL136454.1 | -1.33           | 4.91E-04 | 2.45E-02             |

**Table S2A.** List of genes differentially expressed in the NME1<sup>LOW</sup> subpopulation (continued).

| Gene       | Log Fold Change | P-Value  | False Discovery Rate |
|------------|-----------------|----------|----------------------|
| NME1       | -1.34           | 6.33E-13 | 4.43E-10             |
| RAB5C      | -1.35           | 1.49E-20 | 3.73E-17             |
| AC099850.3 | -1.36           | 4.20E-04 | 2.17E-02             |
| NCCRP1     | -1.36           | 3.35E-04 | 1.86E-02             |
| IBTK       | -1.37           | 3.27E-06 | 4.73E-04             |
| ZNF114     | -1.38           | 7.06E-07 | 1.28E-04             |
| PCSK9      | -1.39           | 4.54E-06 | 6.09E-04             |
| CCDC71     | -1.42           | 2.86E-06 | 4.26E-04             |
| HIST1H1E   | -1.43           | 2.66E-22 | 8.47E-19             |
| AL590762.3 | -1.53           | 7.79E-04 | 3.38E-02             |
| PYCARD     | -1.54           | 2.96E-05 | 2.77E-03             |
| AP001922.4 | -1.56           | 3.92E-05 | 3.44E-03             |
| ELFN1      | -1.59           | 1.83E-05 | 1.88E-03             |
| RANGRF     | -1.64           | 4.32E-06 | 5.86E-04             |
| PDZD4      | -1.68           | 7.39E-08 | 1.81E-05             |
| RAD23B     | -1.68           | 3.34E-35 | 3.90E-31             |
| CORO6      | -1.70           | 7.13E-10 | 2.77E-07             |
| AP000662.1 | -1.70           | 2.52E-05 | 2.45E-03             |
| RNF31      | -1.72           | 8.21E-06 | 9.71E-04             |
| AC007066.1 | -1.72           | 1.03E-04 | 7.43E-03             |
| EXOC3L2    | -1.73           | 1.26E-04 | 8.82E-03             |
| AC113410.1 | -1.77           | 8.29E-04 | 3.53E-02             |
| MT-TY      | -1.77           | 2.92E-06 | 4.32E-04             |
| MT-TE      | -1.78           | 8.59E-04 | 3.62E-02             |
| AC009362.1 | -1.79           | 1.19E-05 | 1.31E-03             |
| TOX        | -1.79           | 2.10E-04 | 1.28E-02             |
| HIC1       | -1.81           | 3.60E-08 | 9.41E-06             |
| MPZ        | -1.81           | 8.26E-04 | 3.52E-02             |
| AP001024.1 | -1.85           | 1.20E-03 | 4.59E-02             |
| THY1       | -1.89           | 9.17E-09 | 2.82E-06             |
| SLC16A5    | -1.92           | 9.18E-05 | 6.75E-03             |
| FOPNL      | -1.93           | 2.53E-10 | 1.06E-07             |
| COL1A1     | -1.98           | 4.28E-05 | 3.70E-03             |
| F8A2       | -2.01           | 1.41E-04 | 9.54E-03             |
| TNFAIP2    | -2.03           | 1.60E-04 | 1.05E-02             |
| IGF2BP1    | -2.06           | 2.16E-22 | 7.57E-19             |
| SLFN11     | -2.12           | 4.25E-04 | 2.19E-02             |
| RPL23AP18  | -2.12           | 1.82E-04 | 1.16E-02             |
| MDFI       | -2.16           | 1.10E-04 | 7.85E-03             |
| ACTG1P9    | -2.20           | 4.09E-04 | 2.14E-02             |
| AC092670.1 | -2.25           | 1.19E-07 | 2.77E-05             |
| CD79B      | -2.27           | 1.40E-04 | 9.49E-03             |

**Table S2A.** List of genes differentially expressed in the NME1<sup>LOW</sup> subpopulation (continued).

| Gene       | Log Fold Change | P-Value  | False Discovery Rate |
|------------|-----------------|----------|----------------------|
| RPL12P35   | -2.32           | 5.04E-04 | 2.49E-02             |
| ERI1       | -2.37           | 2.74E-35 | 3.90E-31             |
| AKAP5      | -2.65           | 6.72E-04 | 3.09E-02             |
| UBBP1      | -2.66           | 1.14E-03 | 4.44E-02             |
| AC009414.2 | -2.68           | 6.83E-04 | 3.13E-02             |
| AC091839.1 | -2.73           | 2.12E-06 | 3.31E-04             |
| S100A11P1  | -2.77           | 8.99E-07 | 1.60E-04             |
| NTS        | -2.78           | 7.45E-04 | 3.29E-02             |
| AC087190.1 | -2.91           | 4.05E-10 | 1.65E-07             |
| TTC16      | -3.04           | 3.70E-07 | 7.24E-05             |
| RELN       | -3.28           | 1.50E-04 | 9.99E-03             |
| AICDA      | -3.54           | 2.34E-04 | 1.39E-02             |
| RPS26P6    | -3.84           | 1.40E-25 | 8.19E-22             |
| NXP3       | -4.23           | 3.00E-06 | 4.41E-04             |
| ZNF780B    | -4.53           | 1.49E-24 | 6.51E-21             |
| SCUBE1     | -4.63           | 2.31E-04 | 1.38E-02             |
| CT45A2     | -4.68           | 6.25E-04 | 2.96E-02             |
| AC090543.2 | -4.68           | 3.78E-17 | 5.29E-14             |
| AC138517.2 | -4.97           | 1.26E-04 | 8.82E-03             |

**Table S2B.** The NME1<sup>LOW</sup> subpopulation exhibits elevated expression of genes related to two GO Biological Processes.

| <b>GO Biological Process</b>       | <b>Number of Genes</b> | <b>Expected Number of Genes</b> | <b>Fold Enrichment</b> | <b>P-Value</b> | <b>False Discovery Rate</b> |
|------------------------------------|------------------------|---------------------------------|------------------------|----------------|-----------------------------|
| Anatomical Structure Morphogenesis | 38                     | 9.7                             | 3.92                   | 2.45E-06       | 3.82E-02                    |
| Tube Development                   | 15                     | 3.8                             | 3.95                   | 6.27E-06       | 4.93E-02                    |

**Table S2C.** Biological processes related to anatomical structure/morphogenesis that are altered in the NME1<sup>LOW</sup> subpopulation.

| Process                                                          | Fold Enrichment | P-Value  | False Discovery Rate | Number of Genes | Genes                                                                                                                                                           |
|------------------------------------------------------------------|-----------------|----------|----------------------|-----------------|-----------------------------------------------------------------------------------------------------------------------------------------------------------------|
| Angiogenesis                                                     | 17.89           | 1.01E-07 | 4.36E-05             | 7               | CXCL8, HEY1, SLIT2, RAMP1, PTEN, TGFA, CDH13                                                                                                                    |
| Bone Development                                                 | 16.49           | 1.02E-04 | 1.04E-02             | 4               | COL12A1, FAM20C, BMP2, VIT                                                                                                                                      |
| Positive Regulation of Neuron Differentiation                    | 15.68           | 2.41E-07 | 7.86E-05             | 7               | NTRK2, PLXNA2, EPHA4, SLIT2, RASAL1, PTEN, BMP2, AL133284                                                                                                       |
| Negative Regulation of Cell Adhesion                             | 12.32           | 3.04E-04 | 2.34E-02             | 4               | PLXNA2, PTEN, CDH13, BMP2                                                                                                                                       |
| Positive Regulation of Cell Migration                            | 10.32           | 2.08E-05 | 2.85E-03             | 6               | CXCL8, AKT3, IGFBP5, CDH13, BMP2, AL133284                                                                                                                      |
| Transmembrane Receptor Protein Tyrosine Kinase Signaling Pathway | 9.30            | 3.71E-05 | 4.60E-03             | 6               | NTRK2, AC092368, GFRA1, EPHA4, AREG, PTEN, TGFA                                                                                                                 |
| Heart Development                                                | 9.28            | 3.75E-05 | 4.61E-03             | 6               | HEY1, SLIT2, PTEN, AC004057, BMP2, RYR2                                                                                                                         |
| Embryo Development                                               | 7.69            | 1.29E-06 | 2.80E-04             | 10              | BHLHE41, CXCL8, ITPK1, PLXNA2, COL12A1, HEY1, TJP1, BMP2, AC090673, RYR2                                                                                        |
| Response to Growth Factor                                        | 7.49            | 4.83E-04 | 3.28E-02             | 8               | NTRK2, AC0902368, CXCL8, ZYX, PTEN, PDE2A, BMP2, RYR2                                                                                                           |
| Negative Regulation of Cell Cycle                                | 7.34            | 5.31E-04 | 3.50E-02             | 8               | AC012085, CXCL8, PINX1, AL161431, PTEN, BMP2, AC090673, RAD17                                                                                                   |
| Regulation of Signaling Receptor Activity                        | 7.07            | 6.27E-04 | 3.83E-02             | 9               | CXCL8, NPTX1, LYPD1, AREG, CD70, GPRC5A, PTEN, TGFA, BMP2                                                                                                       |
| Negative Regulation of Apoptotic Process                         | 5.12            | 9.17E-04 | 4.96E-02             | 6               | NTRK2, EPHA4, PTEN, TGFA, AC090673, AL133284,                                                                                                                   |
| Animal Organ Development                                         | 5.07            | 6.55E-12 | 8.53E-09             | 22              | NTRK2, BHLHE41, CXCL8, AKT3, IGFBP5, AL161431, PLXNA2, COL12A1, HEY1, EPHA4, CLDN4, SLIT2, AREG, PTEN, PDE2A, TGFA, FAM20C, AC004057, BMP2, AC090673, RYR2, VIT |

**Table S2D.** Individual anatomical structure/morphogenesis genes that are altered in the NME1<sup>LOW</sup> subpopulation.

| <b>Anatomical Structure Morphogenesis</b> |                        |                             |
|-------------------------------------------|------------------------|-----------------------------|
| <b>Gene</b>                               | <b>Log Fold Change</b> | <b>False Discovery Rate</b> |
| SLIT2                                     | 1.01                   | 4.51E-02                    |
| GPRC5A                                    | 1.01                   | 4.51E-02                    |
| PLXNA2                                    | 1.07                   | 6.80E-04                    |
| HEY1                                      | 1.08                   | 1.20E+13                    |
| COL12A1                                   | 1.11                   | 1.10E-04                    |
| AC004057                                  | 1.12                   | 2.37E-12                    |
| TGFA                                      | 1.12                   | 1.69E-16                    |
| CXCL8                                     | 1.15                   | 3.00E-04                    |
| ITPK1                                     | 1.15                   | 2.00E-04                    |
| AC090673                                  | 1.16                   | 4.70E-02                    |
| ZYX                                       | 1.16                   | 2.01E-02                    |
| BMP2                                      | 1.17                   | 3.07E-02                    |
| RAD17                                     | 1.18                   | 1.20E-03                    |
| TJP1                                      | 1.19                   | 2.92E-02                    |
| VIT                                       | 1.22                   | 5.83E-09                    |
| RYR2                                      | 1.28                   | 1.60E-02                    |
| AC012085                                  | 1.33                   | 3.34E-06                    |
| CD70                                      | 1.37                   | 1.70E-02                    |
| NTRK2                                     | 1.37                   | 1.81E-04                    |
| PDE2A                                     | 1.42                   | 4.01E-02                    |
| FAM20C                                    | 1.42                   | 1.65E-15                    |
| NPTX1                                     | 1.42                   | 1.29E-02                    |
| LYPD1                                     | 1.44                   | 5.70E-03                    |
| CLDN4                                     | 1.48                   | 1.00E-03                    |
| RAMP1                                     | 1.49                   | 2.03E-15                    |
| GFRA1                                     | 1.53                   | 4.91E-06                    |
| AREG                                      | 1.63                   | 9.00E-04                    |
| CDH13                                     | 1.63                   | 2.94E-10                    |
| IGFBP5                                    | 1.67                   | 9.01E-08                    |
| BHLHE41                                   | 1.74                   | 2.60E-04                    |
| RASAL1                                    | 1.85                   | 2.00E-04                    |
| AL133284                                  | 1.98                   | 2.40E-02                    |
| EPHA4                                     | 1.99                   | 1.03E-03                    |
| PTEN                                      | 2.06                   | 6.38E-13                    |
| AKT3                                      | 2.18                   | 5.60E-10                    |
| AC092368                                  | 2.31                   | 2.90E-02                    |
| AL161431                                  | 2.32                   | 3.32E-02                    |
| PINX1                                     | 2.57                   | 9.90E-05                    |

**Table S2E.** Individual tube development genes that are altered in the NME1<sup>LOW</sup> subpopulation.

| <b>Tube Development</b> |                        |                             |
|-------------------------|------------------------|-----------------------------|
| <b>Gene</b>             | <b>Log Fold Change</b> | <b>False Discovery Rate</b> |
| SLIT2                   | 1.01                   | 4.51E-02                    |
| PLXNA2                  | 1.07                   | 6.80E-04                    |
| HEY1                    | 1.08                   | 1.20E+13                    |
| TGFA                    | 1.12                   | 1.69E-16                    |
| CXCL8                   | 1.15                   | 3.00E-04                    |
| ITPK1                   | 1.15                   | 2.00E-04                    |
| BMP2                    | 1.17                   | 3.07E-02                    |
| RYR2                    | 1.28                   | 1.60E-02                    |
| NTRK2                   | 1.37                   | 1.81E-04                    |
| RAMP1                   | 1.49                   | 2.03E-15                    |
| AREG                    | 1.63                   | 9.00E-04                    |
| CDH13                   | 1.63                   | 2.94E-10                    |
| IGFBP5                  | 1.67                   | 9.01E-08                    |
| EPHA4                   | 1.99                   | 1.03E-03                    |
| PTEN                    | 2.06                   | 6.38E-13                    |



**Table S2F.** The GO Cellular Component “Receptor Complex” is upregulated in the NME1<sup>LOW</sup> subpopulation.

| <b>GO Cellular Component</b> | <b>Number of Genes</b> | <b>Expected Number of Genes</b> | <b>Fold Enrichment</b> | <b>P-Value</b> | <b>False Discovery Rate</b> |
|------------------------------|------------------------|---------------------------------|------------------------|----------------|-----------------------------|
| Receptor Complex             | 6                      | 0.51                            | 11.78                  | 9.94E-06       | 1.98E-02                    |

**Table S2G.** Individual “Receptor Complex” genes that are altered in the NME1<sup>LOW</sup> subpopulation.

| <b>Receptor Complex</b> |                        |                             |
|-------------------------|------------------------|-----------------------------|
| <b>Gene</b>             | <b>Log Fold Change</b> | <b>False Discovery Rate</b> |
| PLXNA2                  | 1.07                   | 6.88E-04                    |
| BMP2                    | 1.17                   | 3.07E-02                    |
| NTRK2                   | 1.37                   | 1.89E-04                    |
| RAMP1                   | 1.49                   | 2.03E-15                    |
| GFRA1                   | 1.53                   | 4.91E-06                    |
| EPHA4                   | 1.99                   | 1.03E-03                    |

**Table S3.** Expression of stem cell genes that are not altered in the NME1<sup>LOW</sup> subpopulation.

| <b>Gene</b>   | <b>Log Fold Change</b> | <b>False Discovery Rate</b> |
|---------------|------------------------|-----------------------------|
| ABCG2         | -0.54                  | 0.192                       |
| CCNB1         | -0.16                  | 0.839                       |
| JARID1        | 0.03                   | 1.000                       |
| PROM1 (CD133) | 0.03                   | 1.000                       |
| SALL4         | 0.13                   | 1.000                       |
| MLANA         | 0.13                   | 1.000                       |
| CD44          | 0.16                   | 0.664                       |
| ABCB5         | 0.16                   | 1.000                       |
| SOX10         | 0.20                   | 0.462                       |
| SOX2          | 0.32                   | 0.336                       |
| ALDH1         | 0.42                   | 0.520                       |
| KLF4          | 0.58                   | 0.116                       |
| ABCB1         | 0.65                   | 0.707                       |
| CD34          | 0.88                   | 0.670                       |
| CXCR6         | 1.07                   | 0.732                       |
| NANOG         | below detection        | N.A.                        |
| OCT4          | below detection        | N.A.                        |

**Table S4.** Oligodeoxynucleotide primers used for qRT-PCR measurements of relevant transcripts.

| <b>Gene</b> | <b>Orientation</b> | <b>Sequence (5'-3')</b> |
|-------------|--------------------|-------------------------|
| AKT3        | For                | ATGCTGGACAAAGATGGC      |
|             | Rev                | CAGAATGTCTTCATGGTG      |
| GFRA1       | For                | AAGGAGACCAACTTCAGC      |
|             | Rev                | CTTCTCCTTCTTCATACC      |
| NME1        | For                | CTGAATGTGGTGAAGACGG     |
|             | Rev                | TATGCAGAAGTCTCCACGG     |
| SLC14a2     | For                | TTCCATCTTCAGCAAG        |
|             | Rev                | AAGAAGAGGTTGTAGT        |
